# Supplementary material for: miR-877-3p targets Smad7 and is associated with myofibroblast differentiation and bleomycin-induced lung fibrosis
Source: PubMed Central journal article supplement (PMC4957095; doi:10.1038/srep30122), 2016-07-22
Supplement: srep30122-s1.pdf [file srep30122-s1.pdf]

**Title:** miR-877-3p targets Smad7 and is associated with myofibroblast differentiation and bleomycin-induced lung fibrosis

**Authors:** Cong Wang<sup>1,2</sup>, Shen Gu<sup>1,2</sup>, Honghui Cao<sup>1,2</sup>, Zutong Li<sup>1,2</sup>, Zou Xiang<sup>3</sup>, Kebin Hu<sup>4</sup>, Xiaodong Han<sup>1,2\*</sup>

**Affiliation of each author:**

<sup>1</sup> Immunology and Reproduction Biology Laboratory & State Key Laboratory of Analytical Chemistry for Life Science, Medical School, Nanjing University, Nanjing, Jiangsu 210093, China

<sup>2</sup> Jiangsu Key Laboratory of Molecular Medicine, Nanjing University, Nanjing, Jiangsu 210093, China

<sup>3</sup> Department of Microbiology and Immunology, Mucosal Immunobiology and Vaccine Research Center, Institute of Biomedicine, University of Gothenburg, Gothenburg, Sweden

<sup>4</sup> Department of Medicine, Division of Nephrology, Penn State University College of Medicine, Hershey, Pennsylvania 17033

## Supplemental Information

**Supplementary Table S1** The entire list of profiled miRNA in lung resident mesenchymal stem cells following TGF- $\beta$ 1-induced myofibroblast differentiation

| Assay           | Fold-change(TGF- $\beta$ 1/Control) | P-value   |
|-----------------|-------------------------------------|-----------|
| mmu-miR-877-3p  | 423.180                             | 0.0218507 |
| mmu-miR-497     | 289.158                             | 0.0218864 |
| mmu-miR-141     | 100.550                             | 0.0219615 |
| mmu-miR-1188    | 95.116                              | 0.0220154 |
| mmu-miR-135a    | 87.659                              | 0.0221247 |
| mmu-miR-541     | 75.057                              | 0.0222315 |
| mmu-miR-466J    | 69.987                              | 0.0223636 |
| rno-miR-327     | 68.916                              | 0.0224444 |
| mmu-miR-1956    | 65.876                              | 0.0224753 |
| mmu-miR-369-5p  | 59.520                              | 0.0225365 |
| mmu-miR-342-5p  | 52.496                              | 0.0225556 |
| mmu-miR-322#    | 51.806                              | 0.0226004 |
| rno-miR-99a#    | 46.179                              | 0.0228223 |
| mmu-miR-551b    | 42.938                              | 0.0228599 |
| mmu-miR-190     | 41.566                              | 0.0228745 |
| mmu-miR-202-3p  | 36.158                              | 0.0228974 |
| mmu-miR-493     | 35.821                              | 0.0231079 |
| mmu-miR-196b    | 34.326                              | 0.0231122 |
| mmu-miR-448     | 30.534                              | 0.0231566 |
| rno-miR-758     | 30.285                              | 0.0233726 |
| mmu-miR-295     | 27.431                              | 0.0233974 |
| mmu-miR-1186    | 27.345                              | 0.0234503 |
| mmu-miR-200c    | 24.499                              | 0.0234544 |
| mmu-miR-297a#   | 21.878                              | 0.0234611 |
| mmu-miR-136#    | 20.736                              | 0.0235529 |
| rno-miR-743b    | 20.307                              | 0.0237209 |
| mmu-miR-672     | 17.205                              | 0.023817  |
| mmu-miR-1982.2  | 16.930                              | 0.0238287 |
| mmu-miR-1939    | 16.397                              | 0.023875  |
| mmu-miR-669n    | 16.286                              | 0.0238942 |
| mmu-miR-16#     | 16.274                              | 0.0239037 |
| mmu-miR-1894-3p | 15.404                              | 0.0240543 |
| mmu-miR-301b    | 14.420                              | 0.0241593 |
| hsa-miR-33a#    | 14.152                              | 0.024188  |
| mmu-miR-129-5p  | 12.345                              | 0.024388  |
| mmu-miR-107     | 12.262                              | 0.0244387 |

|                 |        |           |
|-----------------|--------|-----------|
| mmu-miR-665     | 11.897 | 0.0244408 |
| mmu-miR-542-5p  | 11.583 | 0.0244711 |
| mmu-miR-1933-5p | 11.077 | 0.0244787 |
| hsa-miR-30d#    | 10.949 | 0.0245249 |
| mmu-miR-193     | 10.863 | 0.0245368 |
| mmu-miR-1960    | 10.809 | 0.0247115 |
| mmu-miR-188-5p  | 10.632 | 0.0248069 |
| mmu-miR-185     | 10.552 | 0.0248759 |
| mmu-miR-345     | 10.359 | 0.0249034 |
| mmu-miR-1928    | 10.294 | 0.0249208 |
| mmu-miR-183     | 10.141 | 0.0249339 |
| hsa-miR-23a#    | 10.100 | 0.0249456 |
| mmu-miR-344     | 10.097 | 0.0249628 |
| mmu-miR-133a    | 10.078 | 0.0249926 |
| mmu-miR-412     | 9.701  | 0.0251105 |
| mmu-miR-708     | 9.619  | 0.0252215 |
| mmu-miR-542-3p  | 9.449  | 0.0252373 |
| mmu-miR-10a     | 9.406  | 0.0253257 |
| mmu-miR-339-5p  | 9.279  | 0.0254089 |
| rno-miR-743a    | 9.020  | 0.0256511 |
| mmu-miR-1897-3p | 8.975  | 0.0256968 |
| hsa-miR-29a#    | 8.951  | 0.025715  |
| mmu-miR-706     | 8.888  | 0.0257295 |
| mmu-miR-1982.1  | 8.870  | 0.0257795 |
| mmu-miR-489     | 8.616  | 0.0259303 |
| rno-miR-29c#    | 8.329  | 0.02599   |
| mmu-miR-1193    | 8.291  | 0.0260915 |
| mmu-miR-466k    | 7.814  | 0.0261578 |
| mmu-miR-138#    | 7.765  | 0.0261794 |
| mmu-miR-669a    | 7.625  | 0.0261939 |
| mmu-miR-376a#   | 7.552  | 0.0262237 |
| mmu-miR-367     | 7.251  | 0.0264607 |
| hsa-miR-28-3p   | 7.003  | 0.0265669 |
| mmu-miR-208     | 6.819  | 0.0266524 |
| mmu-miR-467b    | 6.813  | 0.0266544 |
| mmu-miR-673-3p  | 6.804  | 0.02688   |
| mmu-miR-466g    | 6.606  | 0.0270587 |
| mmu-miR-491     | 6.355  | 0.0271583 |
| mmu-miR-592     | 6.264  | 0.0271869 |
| mmu-miR-1961    | 6.105  | 0.0272028 |
| mmu-let-7a      | 6.094  | 0.0272067 |
| mmu-miR-423-5p  | 6.063  | 0.0273226 |
| mmu-miR-21      | 5.919  | 0.027367  |

|                 |       |           |
|-----------------|-------|-----------|
| mmu-miR-299     | 5.832 | 0.0274791 |
| hsa-miR-27b#    | 5.785 | 0.0275249 |
| U87             | 5.731 | 0.0276101 |
| mmu-miR-299     | 5.703 | 0.0276448 |
| rno-miR-382#    | 5.684 | 0.0277111 |
| hsa-miR-455     | 5.521 | 0.0278347 |
| mmu-miR-652     | 5.487 | 0.0278601 |
| mmu-miR-125b#   | 5.476 | 0.0278804 |
| mmu-miR-194     | 5.470 | 0.0279679 |
| mmu-miR-331-5p  | 5.453 | 0.0282164 |
| mmu-miR-199b    | 5.355 | 0.0283966 |
| mmu-miR-337-5p  | 5.312 | 0.02844   |
| mmu-miR-547     | 5.236 | 0.0284422 |
| mmu-miR-1905    | 5.219 | 0.0285794 |
| mmu-miR-873     | 5.196 | 0.0285853 |
| mmu-miR-2183    | 5.167 | 0.0286859 |
| mmu-miR-292-3p  | 5.057 | 0.0287    |
| mmu-miR-199a-5p | 4.985 | 0.0287258 |
| hsa-miR-149     | 4.978 | 0.0287598 |
| mmu-miR-346     | 4.930 | 0.0287915 |
| mmu-miR-150     | 4.846 | 0.0287973 |
| mmu-miR-700     | 4.841 | 0.029056  |
| mmu-miR-181a    | 4.806 | 0.0290699 |
| hsa-miR-213     | 4.775 | 0.0291006 |
| mmu-miR-485-3p  | 4.738 | 0.029156  |
| mmu-miR-687     | 4.729 | 0.0291958 |
| mmu-let-7c-1#   | 4.613 | 0.0292239 |
| mmu-miR-376b#   | 4.571 | 0.029264  |
| mmu-miR-463     | 4.471 | 0.0292921 |
| mmu-miR-805     | 4.429 | 0.029507  |
| mmu-miR-496     | 4.392 | 0.029511  |
| hsa-miR-196a    | 4.341 | 0.0295309 |
| mmu-miR-15a#    | 4.284 | 0.029557  |
| mmu-miR-434-5p  | 4.281 | 0.0297581 |
| hsa-miR-493-3p  | 4.279 | 0.0297729 |
| mmu-miR-155     | 4.267 | 0.0297864 |
| mmu-miR-146a    | 4.257 | 0.0298448 |
| mmu-miR-1839-5p | 4.234 | 0.0298496 |
| rno-miR-664     | 4.164 | 0.0298942 |
| mmu-miR-31#     | 4.133 | 0.0299634 |
| mmu-miR-1896    | 4.088 | 0.0300076 |
| snoRNA135       | 4.000 | 0.0300426 |
| mmu-miR-215     | 3.999 | 0.0300743 |

|                 |       |           |
|-----------------|-------|-----------|
| hsa-miR-140-3p  | 3.961 | 0.0300919 |
| hsa-miR-590-3P  | 3.957 | 0.0301587 |
| snoRNA135       | 3.896 | 0.0301653 |
| mmu-miR-878-3p  | 3.887 | 0.0302741 |
| mmu-miR-10b     | 3.880 | 0.0303482 |
| hsa-miR-136#    | 3.840 | 0.0304846 |
| mmu-miR-674#    | 3.832 | 0.0306169 |
| mmu-miR-324-5p  | 3.797 | 0.0306496 |
| rno-miR-532-5p  | 3.784 | 0.0306656 |
| mmu-miR-196a#   | 3.781 | 0.0306882 |
| hsa-miR-875-5p  | 3.668 | 0.0308036 |
| mmu-miR-2146    | 3.652 | 0.0308245 |
| mmu-miR-743a    | 3.635 | 0.0308853 |
| mmu-miR-192     | 3.632 | 0.0309244 |
| hsa-miR-154#    | 3.607 | 0.0309309 |
| mmu-let-7c      | 3.561 | 0.0311791 |
| rno-miR-20b     | 3.550 | 0.031236  |
| mmu-miR-340-5p  | 3.537 | 0.0312462 |
| mmu-miR-182     | 3.531 | 0.0312813 |
| hsa-miR-411#    | 3.520 | 0.0312951 |
| mmu-miR-696     | 3.499 | 0.0312992 |
| hsa-miR-22#     | 3.456 | 0.0314078 |
| mmu-miR-18a     | 3.437 | 0.0314171 |
| hsa-miR-421     | 3.410 | 0.0314175 |
| mmu-miR-467d    | 3.407 | 0.0314423 |
| mmu-miR-467a    | 3.353 | 0.0314651 |
| mmu-miR-543     | 3.343 | 0.0314674 |
| mmu-miR-467a    | 3.341 | 0.0314935 |
| mmu-miR-1948    | 3.281 | 0.0315254 |
| mmu-miR-101b    | 3.271 | 0.0315549 |
| mmu-miR-1971    | 3.196 | 0.0316617 |
| mmu-miR-2182    | 3.196 | 0.0317061 |
| mmu-miR-669m    | 3.187 | 0.0317287 |
| mmu-miR-1944    | 3.115 | 0.0317701 |
| mmu-miR-29b     | 3.064 | 0.0317992 |
| hsa-miR-151-5P  | 3.048 | 0.0319828 |
| mmu-miR-881#    | 3.037 | 0.0319991 |
| mmu-miR-370     | 3.012 | 0.0320717 |
| rno-miR-148b-5p | 3.002 | 0.0320789 |
| mmu-let-7d      | 2.990 | 0.0321423 |
| mmu-let-7e      | 2.979 | 0.0321748 |
| hsa-miR-200c    | 2.942 | 0.0322222 |
| rno-miR-350     | 2.935 | 0.0323288 |

|                 |       |           |
|-----------------|-------|-----------|
| rno-miR-381     | 2.926 | 0.0323519 |
| hsa-miR-27a#    | 2.911 | 0.0323519 |
| mmu-miR-2134    | 2.906 | 0.0323544 |
| mmu-miR-130b#   | 2.886 | 0.0323551 |
| mmu-miR-467b    | 2.856 | 0.0323618 |
| mmu-miR-487b    | 2.850 | 0.0323768 |
| mmu-miR-1937b   | 2.832 | 0.0324939 |
| mmu-miR-361     | 2.827 | 0.0325479 |
| mmu-miR-465a-5p | 2.794 | 0.0325479 |
| mmu-miR-125b-5p | 2.751 | 0.0325479 |
| mmu-miR-214     | 2.747 | 0.0325479 |
| mmu-miR-433     | 2.721 | 0.0325479 |
| mmu-miR-804     | 2.711 | 0.0325767 |
| snoRNA202       | 2.693 | 0.03258   |
| mmu-miR-101a    | 2.647 | 0.0327789 |
| mmu-miR-466a-3p | 2.644 | 0.0328365 |
| rno-miR-343     | 2.612 | 0.0328755 |
| mmu-miR-290-5p  | 2.600 | 0.0329161 |
| mmu-miR-7a      | 2.588 | 0.0329433 |
| mmu-miR-495     | 2.579 | 0.0329484 |
| mmu-miR-467F    | 2.551 | 0.0329755 |
| mmu-miR-2135    | 2.539 | 0.033041  |
| mmu-let-7a#     | 2.496 | 0.0331154 |
| mmu-miR-224     | 2.494 | 0.0331691 |
| mmu-miR-345-5p  | 2.493 | 0.0333205 |
| mmu-miR-128a    | 2.489 | 0.0336463 |
| mmu-miR-125b-3p | 2.477 | 0.0336492 |
| hsa-miR-183#    | 2.440 | 0.0337056 |
| mmu-miR-34c#    | 2.426 | 0.0337302 |
| hsa-miR-744#    | 2.422 | 0.0337489 |
| mmu-miR-669l    | 2.418 | 0.033793  |
| hsa-miR-214     | 2.415 | 0.0338634 |
| mmu-miR-127     | 2.412 | 0.033881  |
| hsa-miR-200c#   | 2.411 | 0.0339174 |
| mmu-miR-328     | 2.406 | 0.0339265 |
| mmu-miR-503     | 2.404 | 0.0340003 |
| mmu-miR-409-5p  | 2.403 | 0.0340498 |
| mmu-miR-744     | 2.402 | 0.0340507 |
| mmu-miR-17#     | 2.377 | 0.0341888 |
| mmu-miR-1274a   | 2.368 | 0.0342138 |
| mmu-miR-98      | 2.363 | 0.0342577 |
| mmu-miR-1949    | 2.362 | 0.0342752 |
| rno-miR-7a#     | 2.358 | 0.0342903 |

|                |       |           |
|----------------|-------|-----------|
| mmu-miR-470#   | 2.344 | 0.0343022 |
| mmu-miR-216a   | 2.343 | 0.0343145 |
| mmu-miR-23b    | 2.340 | 0.0343164 |
| hsa-miR-15b#   | 2.331 | 0.0343541 |
| mmu-miR-148b   | 2.319 | 0.034433  |
| mmu-miR-329    | 2.303 | 0.0344639 |
| rno-miR-7#     | 2.293 | 0.0346168 |
| mmu-miR-376a   | 2.282 | 0.0346824 |
| mmu-miR-34c    | 2.278 | 0.0346858 |
| rno-miR-632    | 2.272 | 0.0347518 |
| mmu-miR-193#   | 2.246 | 0.0347772 |
| hsa-miR-106b#  | 2.243 | 0.0348278 |
| mmu-miR-382    | 2.227 | 0.0348347 |
| mmu-miR-20a    | 2.215 | 0.034852  |
| hsa-miR-22     | 2.210 | 0.0348879 |
| mmu-miR-872#   | 2.208 | 0.0350129 |
| mmu-miR-409-3p | 2.205 | 0.0350149 |
| mmu-miR-15a    | 2.201 | 0.0350585 |
| mmu-miR-24-2#  | 2.196 | 0.0351828 |
| mmu-let-7b     | 2.184 | 0.0353449 |
| mmu-miR-211    | 2.167 | 0.035377  |
| hsa-miR-93#    | 2.165 | 0.0358401 |
| mmu-miR-340-3p | 2.159 | 0.0358841 |
| mmu-miR-210    | 2.152 | 0.035973  |
| mmu-miR-140    | 2.150 | 0.0362217 |
| mmu-miR-362-3p | 2.142 | 0.0362502 |
| mmu-miR-1937c  | 2.141 | 0.0363422 |
| mmu-miR-218-1# | 2.138 | 0.0363626 |
| mmu-miR-139-5p | 2.120 | 0.0363762 |
| hsa-miR-378    | 2.118 | 0.0365431 |
| hsa-miR-340    | 2.101 | 0.0365655 |
| mmu-miR-667    | 2.096 | 0.0367463 |
| mmu-miR-337    | 2.096 | 0.0367481 |
| mmu-miR-881    | 2.075 | 0.0370294 |
| hsa-miR-423-3P | 2.052 | 0.0370464 |
| mmu-miR-374-5p | 2.039 | 0.037054  |
| snoRNA202      | 2.035 | 0.0371403 |
| mmu-miR-1969   | 2.034 | 0.0371968 |
| mmu-miR-712    | 2.030 | 0.0373512 |
| mmu-miR-467H   | 2.028 | 0.0374167 |
| mmu-miR-380-5p | 2.012 | 0.0374295 |
| mmu-miR-674    | 2.003 | 0.0375104 |
| mmu-miR-204    | 2.001 | 0.037581  |

|                 |       |           |
|-----------------|-------|-----------|
| mmu-miR-685     | 2.000 | 0.0375979 |
| mmu-miR-1903    | 0.489 | 0.0163889 |
| rno-miR-146B    | 0.479 | 0.0164098 |
| mmu-miR-9       | 0.478 | 0.0166278 |
| mmu-miR-503#    | 0.476 | 0.0166351 |
| mmu-miR-697     | 0.471 | 0.0166767 |
| rno-miR-673     | 0.464 | 0.0166852 |
| mmu-miR-721     | 0.442 | 0.0167017 |
| mmu-miR-222     | 0.434 | 0.0167518 |
| mmu-miR-1306    | 0.430 | 0.0167613 |
| mmu-miR-218     | 0.414 | 0.0167781 |
| mmu-miR-1981    | 0.409 | 0.0169408 |
| hsa-miR-9#      | 0.400 | 0.0171027 |
| rno-miR-345-3p  | 0.399 | 0.017162  |
| rno-miR-125b#   | 0.390 | 0.0172665 |
| mmu-miR-103     | 0.367 | 0.017272  |
| mmu-miR-676#    | 0.365 | 0.0174461 |
| mmu-miR-449a    | 0.353 | 0.017475  |
| hsa-miR-143     | 0.335 | 0.0175381 |
| mmu-miR-339-3p  | 0.328 | 0.0177589 |
| mmu-miR-669D    | 0.321 | 0.0177835 |
| rno-miR-351     | 0.319 | 0.0178467 |
| mmu-let-7g#     | 0.316 | 0.0179363 |
| mmu-miR-187     | 0.315 | 0.0179804 |
| mmu-miR-1198    | 0.280 | 0.0180724 |
| hsa-miR-10a#    | 0.280 | 0.0182429 |
| hsa-miR-425     | 0.276 | 0.0183714 |
| mmu-miR-466h    | 0.262 | 0.0184475 |
| mmu-miR-590-5p  | 0.222 | 0.0185203 |
| mmu-miR-741     | 0.205 | 0.018544  |
| mmu-miR-181c    | 0.201 | 0.0186175 |
| mmu-miR-154     | 0.190 | 0.0186945 |
| mmu-miR-137     | 0.166 | 0.0188221 |
| mmu-miR-200a    | 0.164 | 0.0188733 |
| mmu-miR-668     | 0.159 | 0.0189153 |
| mmu-miR-302a    | 0.158 | 0.0189202 |
| mmu-miR-375     | 0.151 | 0.0190783 |
| mmu-miR-770-3p  | 0.144 | 0.0191027 |
| mmu-miR-449b    | 0.144 | 0.0191636 |
| mmu-miR-467e#   | 0.121 | 0.0192722 |
| mmu-miR-742#    | 0.108 | 0.0192877 |
| mmu-miR-666-3p  | 0.101 | 0.0194622 |
| mmu-miR-450a-5p | 0.086 | 0.0196347 |



|                 |       |           |
|-----------------|-------|-----------|
| rno-miR-339-3p  | 0.072 | 0.0199237 |
| mmu-miR-450a-3p | 0.071 | 0.0201402 |
| hsa-miR-1197    | 0.070 | 0.0201507 |
| mmu-miR-362-5p  | 0.060 | 0.0203493 |
| mmu-miR-126-5p  | 0.034 | 0.0204822 |
